# Supplementary material
Source: PubMed Central journal article supplement (PMC10947827)
Supplement: NIHMS1961543-supplement-2.pdf [file NIHMS1961543-supplement-2.pdf]

Supplemental Material

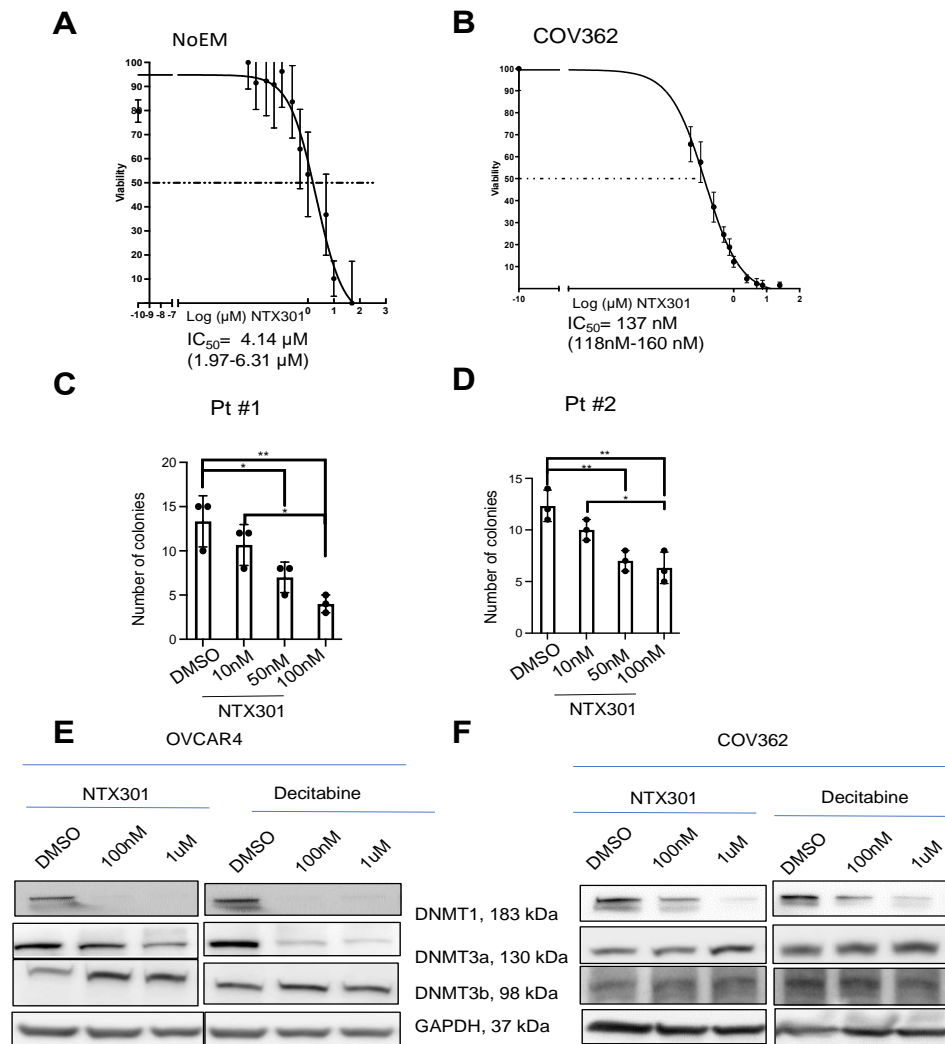

**Supplemental Figure S1. OC cells are highly sensitive to NTX301 treatment.** (A, B) Effects of NTX301 on survival of normal endometrial cells (NoEM) (A) and COV362 OC cells (B) measured as percent viability and  $\text{IC}_{50}$ . Cells were treated daily for 4 days and viable cells were measured (CCK8 assay) on day 5. (C, D) Numbers (mean  $\pm$  SD, n=3) of colonies formed from 4,000 OC cells derived from tumors of HGSOE patients, and treated with DMSO or NTX301 for 7 days (\* $p < 0.05$ , \*\* $p < 0.01$ , \*\*\* $p < 0.001$ , n=2). (E, F) Western blot of DNMT1, DNMT3a, DNMT3b, and GAPDH (loading control) in OVCAR4 (E) and COV362 (F) OC cells treated with DMSO, NTX301, or decitabine (100nM or 1 $\mu\text{M}$ ) for 48 hours.
