# Supplementary material
Source: PubMed Central journal article supplement (PMC10947827)
Supplement: NIHMS1961543-supplement-3.pdf [file NIHMS1961543-supplement-3.pdf]

Supplemental Material

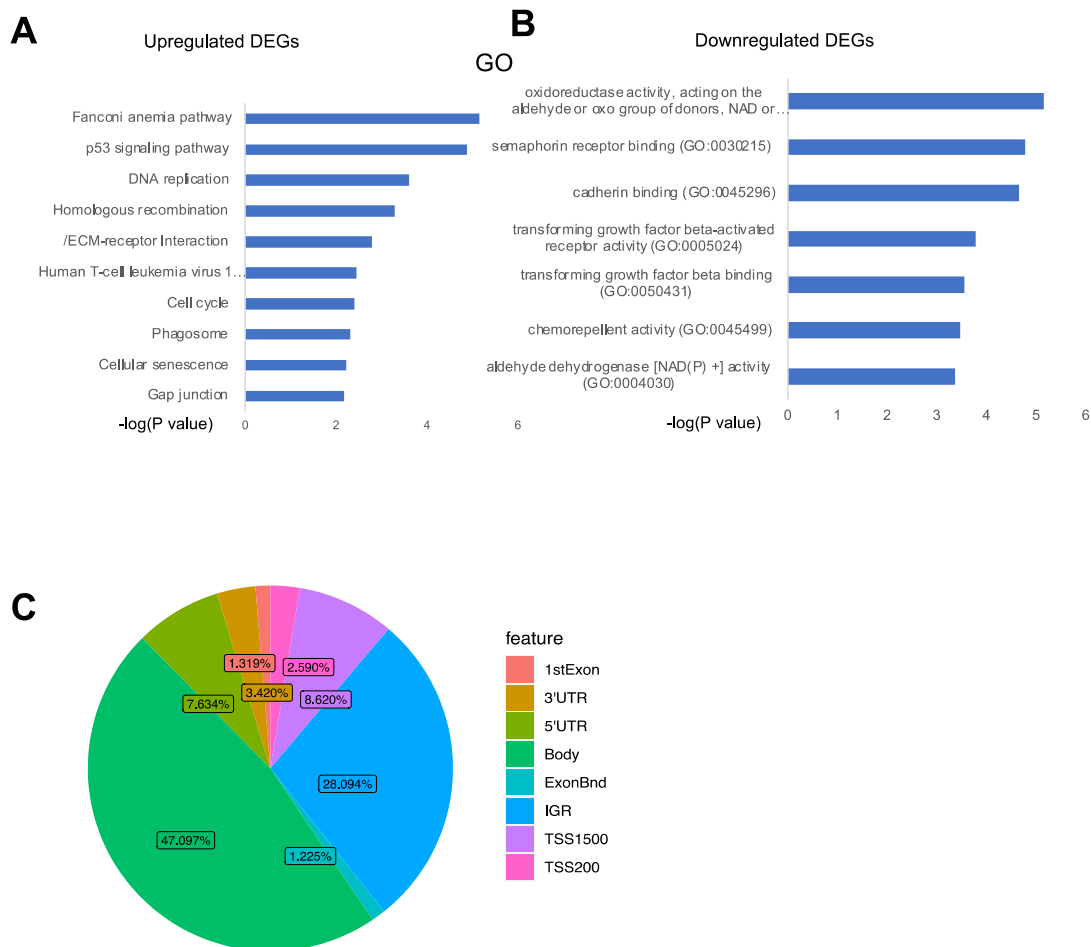

**Supplemental Figure S2. NTX301 induced transcriptome and methylome reprogramming in OC cells. (A,B)** Gene Ontology (GO) analyses of upregulated (A) and downregulated (B) DEGs show top significantly enriched pathways in OVCAR5 cells treated with NTX301 (100nM) vs. DMSO (n=3 replicates per group). (C) The distribution of DMPs in response to treatment with NTX301 across the genome.
