# Supplementary material
Source: PubMed Central journal article supplement (PMC10947827)
Supplement: NIHMS1961543-supplement-4.pdf [file NIHMS1961543-supplement-4.pdf]

Supplemental Material

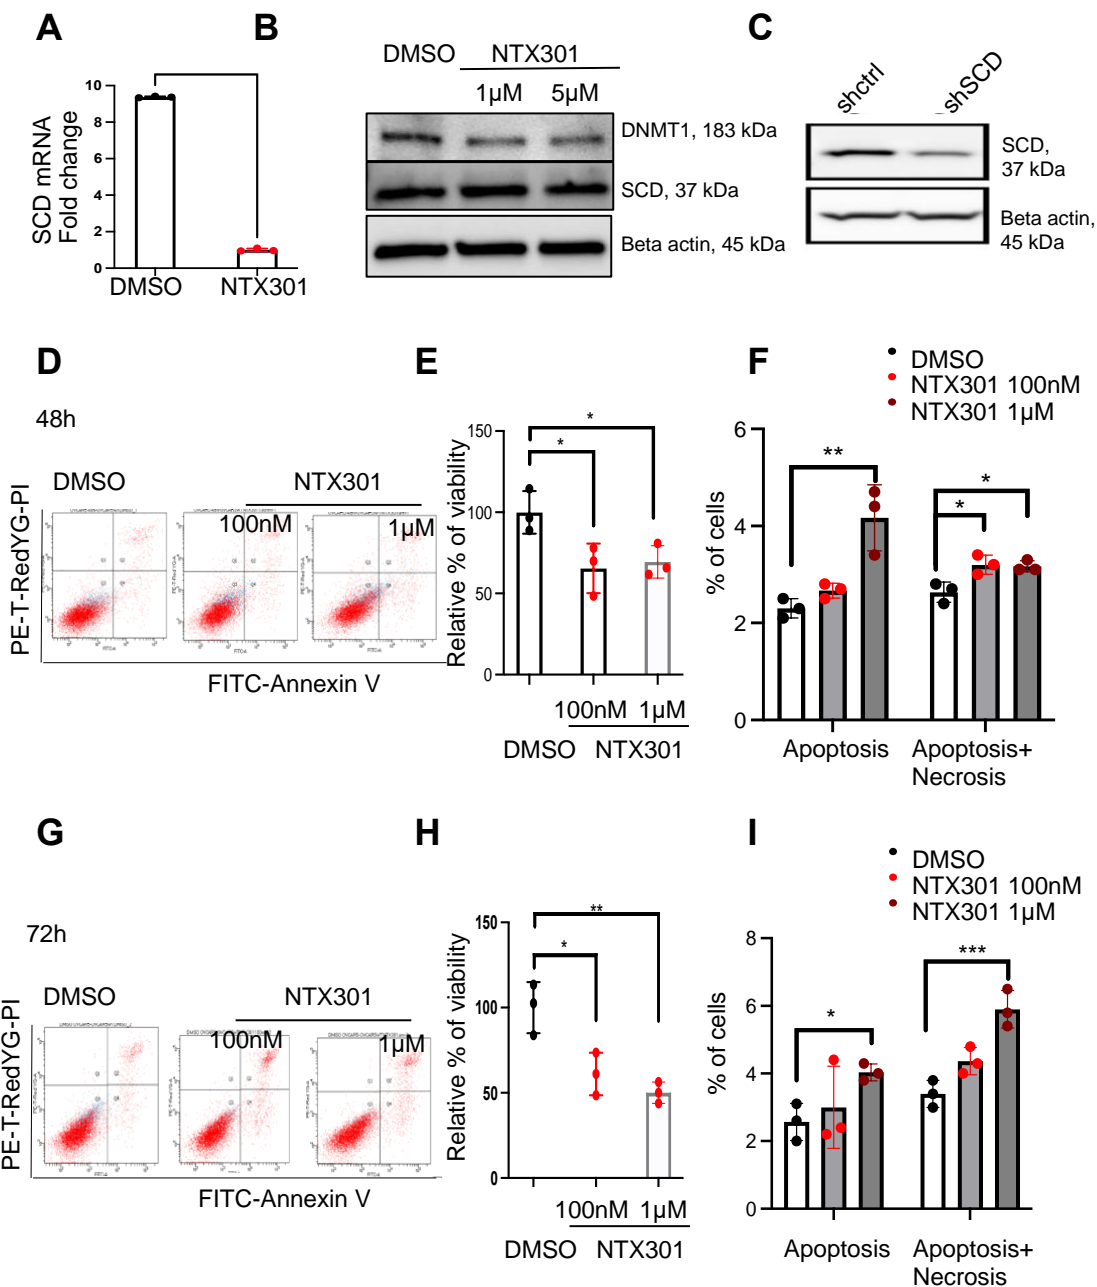

**Supplemental Figure S3. NTX-301 effects in OC cells** (A) mRNA expression levels of SCD measured by qRT-PCR in OVCAR5 cells treated with DMSO or NTX-301 (100nM, 3days) (n=3). (B) Western blot for DNMT1, SCD and  $\beta$  actin in FT190 cells treated with DMSO or NTX-301 (100nM, 1  $\mu$ M, 72 hours, n=2). (C) Western blot for SCD and beta actin in OVCAR5 cells stably transduced with shctrl or shSCD lentiviral particles. (D) Side scatter of FACS analysis of

## Supplemental Material

OVCAR5 cells treated with DMSO or NTX-301 (100nM, 1 $\mu$ M, 48 hours) after staining with Annexin V-FITC and propidium iodide (PI). **(E)** Trypan blue staining shows the relative percentages of viable OVCAR5 cells after treatment with NTX-301 compared to DMSO treated cells (mean  $\pm$  SD, n=3). **(F)** Quantification of the percentage of Annexin V-FITC positive (apoptotic) cells and Annexin V-FITC + propidium iodide (PI) positive (apoptotic and necrotic cells) treated with DMSO or NTX-301 (100nM, 1 $\mu$ M, 48 hours). **(G)** Side scatter of FACS analysis of OVCAR5 cells treated with DMSO or NTX-301 (100nM, 1 $\mu$ M, 72 hours) after staining with Annexin V-FITC and propidium iodide (PI). **(H)** Trypan blue staining shows the relative percentages of viable OVCAR5 cells after treatment with NTX-301 compared to DMSO treated cells (mean  $\pm$  SD, n=3). **(I)** Quantification of the percentage of Annexin V-FITC positive (apoptotic) cells and Annexin V-FITC + propidium iodide (PI) positive (apoptotic and necrotic cells) treated with DMSO or NTX-301 (100nM, 1 $\mu$ M, 72 hours).
