# Supplementary material
Source: PubMed Central journal article supplement (PMC10947827)
Supplement: NIHMS1961543-supplement-5.pdf [file NIHMS1961543-supplement-5.pdf]

Supplemental Material

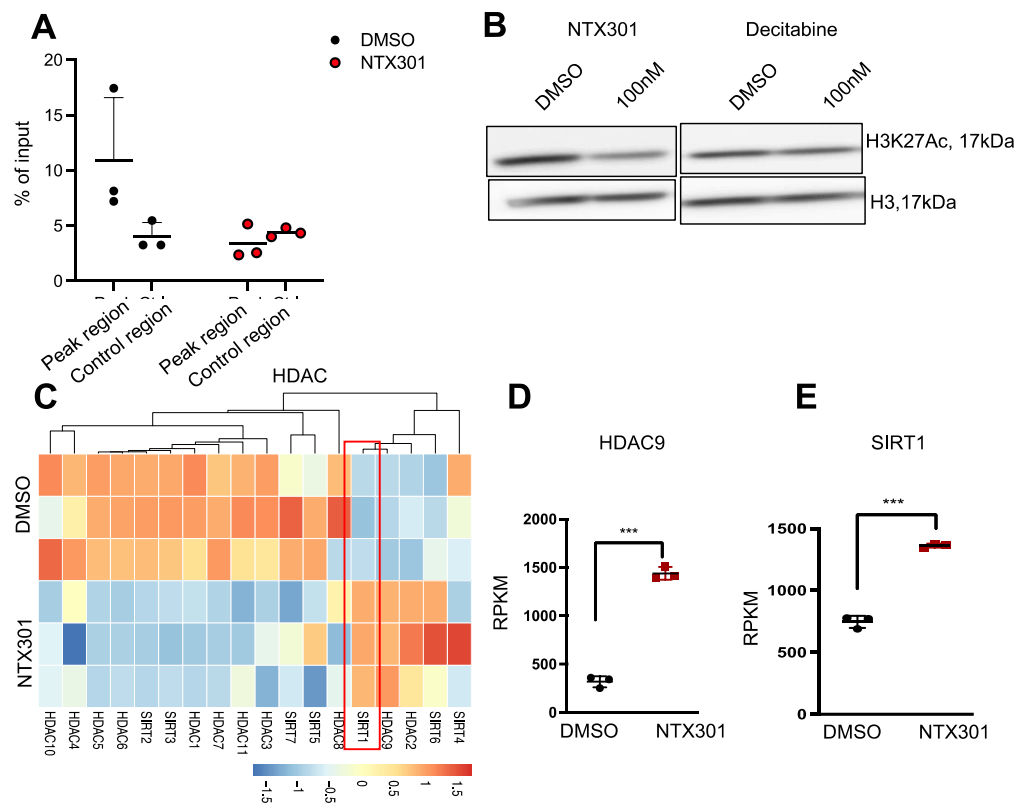

**Supplemental Figure S4. Effects of HMAs on HDAC expression.** (A) ChIP-PCR shows histone H3 enrichment in the SCD gene (Primer\_2) in OVCAR5 cells treated with DMSO or the NTX301 (100nM, 3-day, n=3). Enrichment of H3 on a sequence 1 kb downstream was used as a control (Primer\_1). Results are means  $\pm$  SD, which was analyzed by two-way ANOVA with multiple comparisons (\* $p$ <0.05; \*\* $p$ <0.01; \*\*\* $p$ <0.001). (B) Western blot of H3K27Ac, and H3 in OVCAR5 cells treated with DMSO, NTX301, or decitabine (100nM, 3days). (C) Heatmap shows differentially expressed histone deacetylase HDAC members (1) measured by RNA-seq in OVCAR5 cells treated with DMSO or NTX301 (100nM, 3days) (n = 3). (D, E) mRNA expression of HDAC9 (D) and SIRT1 (E) in OVCAR5 cells treated with DMSO or the NTX301 (100nM, 3days) measured by RNA-seq (RPKM counts; n=3 replicates per group).
