# Supplementary material
Source: PubMed Central journal article supplement (PMC10947827)
Supplement: NIHMS1961543-supplement-6.pdf [file NIHMS1961543-supplement-6.pdf]

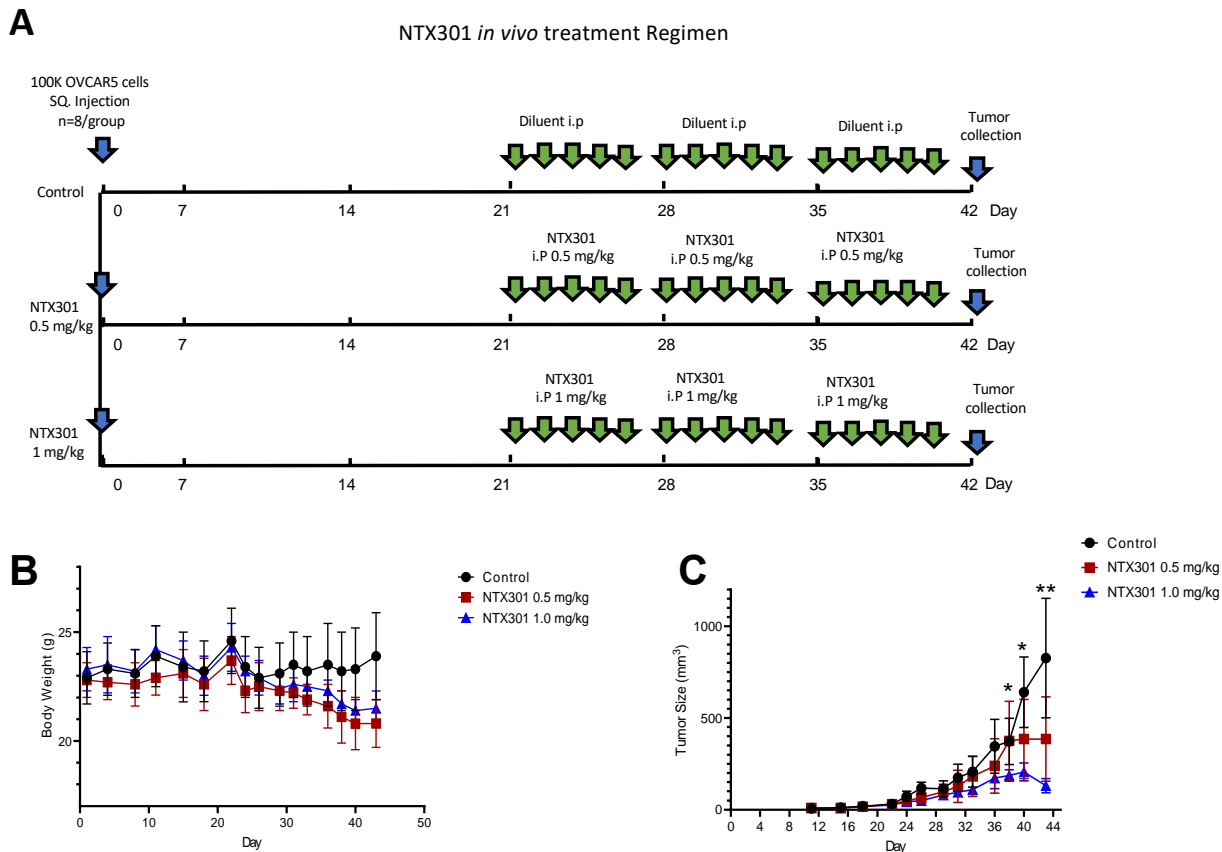

**Supplemental Figure S5. NTX301 inhibits OC tumor growth *in vivo*.** (A) Schematic of NTX301 treatment in an experiment using a OVCAR5 SQ xenograft model. (B) Body weight curves of mice treated with diluent and NTX301 (0.5mg/kg or 1mg/kg) as described in (A). Bars indicate means  $\pm$  SD (n=7). (C) Growth curves of OVCAR5 SQ xenografts in mice treated with diluent, NTX301 (0.5mg/kg or 1mg/kg, 5 days per week for 3 weeks, n=7 mice per group) (\*p<0.05; \*\*p<0.01; \*\*\*p<0.001).
