# Supplementary material
Source: PubMed Central journal article supplement (PMC10947827)
Supplement: NIHMS1961543-supplement-7.pdf [file NIHMS1961543-supplement-7.pdf]

Supplemental Material

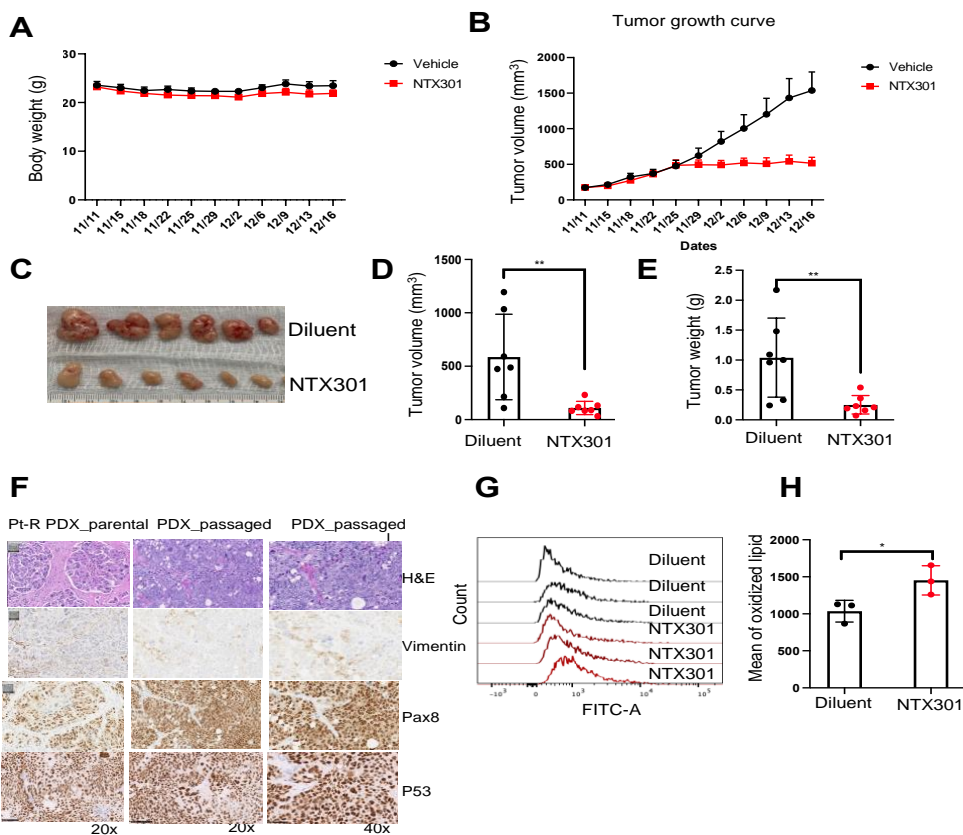

**Supplemental Figure S6. NTX-301 monotherapy inhibits PDX tumor growth.** (A) An experiment to determine the effects of NTX-301 on growth of HGSOC patient-derived xenografts (PDX). Average body weight ( $\pm$  SD) of PDX bearing mice, and (B) growth curves of PDXs from mice treated with diluent or NTX-301. (C-E) Images of PDX tumors (C) and means ( $\pm$  SD) of PDX tumor volumes (D) and tumor weights (E) from mice treated with diluent or NTX-301 as described in (A) (n=6 mice per group). (F) Comparison of histological characteristics (H&E staining) and protein levels of vimentin, Pax8 and P53 measured by IHC in sections of parental and passaged OC PDXs OC xenografts used in this study demonstrate preserved HGSOC histology. (G, H) Histograms of fluorescence intensity (G) and means ( $\pm$  SD, n = 3) (H) of oxidized level of BODIPY 581/591-C11 in cells derived from PDX xenografts collected from the experiment in (A). \*p<0.05; \*\*p<0.01; \*\*\*p<0.001.
