# Supplementary material
Source: PubMed Central journal article supplement (PMC10947827)
Supplement: NIHMS1961543-supplement-8.pdf [file NIHMS1961543-supplement-8.pdf]

**Supplemental Table S1: Tumor characteristics**

|       | Tumor Type                               | Treatment History                                             | Sites   |
|-------|------------------------------------------|---------------------------------------------------------------|---------|
| Pt #1 | Clear cell adenocarcinoma (stage IIIC)   | Neoadjuvant chemotherapy (carboplatin/paclitaxel/bevacizumab) | omentum |
| Pt #2 | high grade serous carcinoma (stage IIIC) | Neoadjuvant chemotherapy (carboplatin/paclitaxelX 4 cycles)   | ovary   |
| Pt #3 | high grade serous carcinoma (stage IIIC) | chemotherapy-naïve                                            | ovary   |
