# Supplementary material
Source: PubMed Central journal article supplement (PMC10947827)
Supplement: NIHMS1961543-supplement-9.pdf [file NIHMS1961543-supplement-9.pdf]

**Supplemental Table S2. Primer sequences for selected genes in qRT-PCR analysis**

| Gene Name | Primer Sequence          |                        |
|-----------|--------------------------|------------------------|
|           | Forward (5' to 3')       | Reverse (5' to 3')     |
| 18S       | CGT CTG CCC TAT CAACTTTC | GATGTGGTAGCC GTTTCTC   |
| ALDH1A1   | AGGGGCAGCCATTTCTTCTCA    | CACGGGCCTCCTCCACATT    |
| SIRT1     | AGAACCCATGGAGGATGAAAG    | TCATCTCCATCAGTCCCAAATC |
| SCD       | ACGATATCTCTAGCTCCTATACC  | GGCATCGTCTCCAACCTATC   |
| SOX2      | TGCTGCCTCTTTAAGACTAGGAC  | CCTGGGGCTCAAACCTTCTCT  |
