# Supplementary material
Source: PubMed Central journal article supplement (PMC10947827)
Supplement: NIHMS1961543-supplement-10.pdf [file NIHMS1961543-supplement-10.pdf]

Supplemental Material

**Supplemental Table S3. Primer sequences for H3K27Ac ChIP-qPCR**

| Gene Name            | Primer Sequence      |                     |
|----------------------|----------------------|---------------------|
|                      | Forward (5' to 3')   | Reverse (5' to 3')  |
| SCD_Ctrl<br>Primer_1 | CTCAGGAGTAGAGGTGATCT | CTGGGATTACAGGCATGAG |
| SCD_Peak<br>Primer_2 | GGCACACACACACCAG     | GTACGCCTGCGAACAAT   |
