# Supplementary material
Source: PubMed Central journal article supplement (PMC10947827)
Supplement: NIHMS1961543-supplement-11.pdf [file NIHMS1961543-supplement-11.pdf]

**Supplemental Table S4. Primary antibody information**

| Name           | Antibody type     | Source                                | Dilution |
|----------------|-------------------|---------------------------------------|----------|
| ALDH1A1        | rabbit monoclonal | Cell signaling<br>Cat# 12035S         | 1:1000   |
| DNMT1          | rabbit monoclonal | Cell signaling<br>Cat# D63A6,         | 1:1000   |
| DNMT3a         | mouse monoclonal  | Novus<br>Car# NB120-1388              | 1:1000   |
| DNMT3b         | rabbit polyclonal | Novus<br>Cat# NB100-266               | 1:1000   |
| SOX2           | mouse monoclonal, | Invitrogen<br>Cat# 20G5               | 1:1000   |
| SCD            | mouse monoclonal, | Abcam,<br>Cat# ab19862                | 1:500    |
| SIRT1          | mouse monoclonal  | Cell signaling<br>Cat# 8469S          | 1:1000   |
| H3K27Ac        | rabbit polyclonal | Abcam<br>Cat# 4729                    | 1:1000   |
| H3             | rabbit polyclonal | Abcam<br>Cat# 1791                    | 1:2000   |
| $\beta$ -actin | mouse monoclonal  | Sigma<br>Cat# A1978                   | 1:20,000 |
| GAPDH          | mouse monoclonal  | Meridian Life Science<br>Cat# H86504M | 1:10,000 |
| alpha tubulin  | mouse monoclonal  | Proteintech<br>Cat# 6603              | 1:10,000 |
