# Supplementary material
Source: PubMed Central journal article supplement (PMC10947827)
Supplement: NIHMS1961543-supplement-12.pdf [file NIHMS1961543-supplement-12.pdf]

## Supplemental Material

**Supplemental Table S5. Top 30 downregulated DEGs in OVCAR5 cells treated with NTX301 compared to DMSO.**

| ensembl_gene_id | baseMean | log2FoldChange | lfcSE | stat   | pvalue   | padj     | hgnc_symbol |
|-----------------|----------|----------------|-------|--------|----------|----------|-------------|
| ENSG00000259479 | 12.26    | -7.15          | 2.41  | -2.97  | 3.01E-03 | 6.42E-03 | SORD2P      |
| ENSG00000275895 | 9.73     | -6.81          | 2.26  | -3.01  | 2.58E-03 | 5.57E-03 |             |
| ENSG00000268738 | 8.61     | -6.64          | 1.35  | -4.90  | 9.53E-07 | 3.11E-06 | HSFX2       |
| ENSG00000272647 | 5.27     | -5.93          | 1.59  | -3.73  | 1.93E-04 | 4.92E-04 |             |
| ENSG00000287218 | 4.19     | -5.60          | 1.52  | -3.68  | 2.32E-04 | 5.84E-04 |             |
| ENSG00000284969 | 5.13     | -4.89          | 1.46  | -3.34  | 8.42E-04 | 1.96E-03 |             |
| ENSG00000244239 | 4.24     | -4.61          | 1.53  | -3.01  | 2.63E-03 | 5.68E-03 | ICA1-AS1    |
| ENSG00000231955 | 3.35     | -4.25          | 1.71  | -2.48  | 1.32E-02 | 2.50E-02 |             |
| ENSG00000169507 | 45.94    | -4.21          | 0.48  | -8.80  | 1.37E-18 | 9.37E-18 | SLC38A11    |
| ENSG00000224174 | 5.81     | -4.13          | 1.32  | -3.14  | 1.69E-03 | 3.75E-03 |             |
| ENSG00000166763 | 14.71    | -4.12          | 1.67  | -2.46  | 1.37E-02 | 2.59E-02 | STRCP1      |
| ENSG00000276259 | 3.01     | -4.09          | 1.75  | -2.34  | 1.95E-02 | 3.56E-02 |             |
| ENSG00000269516 | 13.74    | -3.77          | 0.81  | -4.68  | 2.90E-06 | 9.07E-06 | CYP4F23P    |
| ENSG00000273433 | 4.07     | -3.58          | 1.43  | -2.50  | 1.24E-02 | 2.37E-02 |             |
| ENSG00000109193 | 6.04     | -3.56          | 1.15  | -3.09  | 2.03E-03 | 4.45E-03 | SULT1E1     |
| ENSG00000281100 | 3.90     | -3.52          | 1.45  | -2.43  | 1.50E-02 | 2.81E-02 |             |
| ENSG00000162878 | 2496.26  | -3.36          | 0.07  | -45.75 | 0.00E+00 | 0.00E+00 | PKDCC       |
| ENSG00000184260 | 5.30     | -3.36          | 1.17  | -2.89  | 3.89E-03 | 8.16E-03 | H2AC20      |
| ENSG00000099194 | 34300.76 | -3.23          | 0.05  | -66.01 | 0.00E+00 | 0.00E+00 | SCD         |
| ENSG00000132470 | 10222.52 | -3.23          | 0.05  | -71.13 | 0.00E+00 | 0.00E+00 | ITGB4       |
| ENSG00000188921 | 4.83     | -3.22          | 1.21  | -2.66  | 7.82E-03 | 1.55E-02 | HACD4       |
| ENSG00000149295 | 32.04    | -3.20          | 0.48  | -6.72  | 1.86E-11 | 8.59E-11 | DRD2        |
| ENSG00000205754 | 23.73    | -3.19          | 0.58  | -5.49  | 4.13E-08 | 1.51E-07 | SLCO1B7     |
| ENSG00000221970 | 4.69     | -3.17          | 1.26  | -2.50  | 1.22E-02 | 2.34E-02 | OR2A1       |
| ENSG00000080224 | 65.49    | -3.16          | 0.33  | -9.48  | 2.54E-21 | 1.96E-20 | EPHA6       |
| ENSG00000165121 | 7.77     | -3.14          | 1.01  | -3.13  | 1.78E-03 | 3.94E-03 |             |
| ENSG00000226549 | 13.59    | -3.11          | 0.70  | -4.44  | 8.82E-06 | 2.62E-05 | SCDP1       |
| ENSG00000005108 | 2169.74  | -3.10          | 0.08  | -39.97 | 0.00E+00 | 0.00E+00 | THSD7A      |
| ENSG00000171819 | 10.41    | -3.09          | 0.81  | -3.80  | 1.47E-04 | 3.80E-04 | ANGPTL7     |
| ENSG00000238059 | 5.87     | -3.06          | 1.08  | -2.84  | 4.51E-03 | 9.36E-03 | HSPE1P21    |
