# Supplementary material
Source: PubMed Central journal article supplement (PMC10947827)
Supplement: NIHMS1961543-supplement-13.pdf [file NIHMS1961543-supplement-13.pdf]

**Supplemental Table S6. Top 30 upregulated DEGs in OVCAR5 cells treated with NTX301 compared to DMSO. TSGs are bolded.**

| ensembl_gene_id | baseMean | log2FoldChange | lfcSE | stat | pvalue   | padj     | hgnc_symbol      |
|-----------------|----------|----------------|-------|------|----------|----------|------------------|
| ENSG00000270181 | 83.81    | 8.79           | 1.23  | 7.16 | 7.92E-13 | 3.94E-12 | BIVM-ERCC5       |
| ENSG00000206172 | 47.04    | 7.96           | 1.21  | 6.57 | 5.19E-11 | 2.33E-10 | HBA1             |
| ENSG00000214407 | 22.64    | 7.87           | 1.26  | 6.24 | 4.33E-10 | 1.83E-09 | RDUR             |
| ENSG00000144810 | 20.09    | 7.70           | 1.26  | 6.12 | 9.25E-10 | 3.82E-09 | COL8A1           |
| ENSG00000183160 | 12.37    | 7.00           | 1.30  | 5.38 | 7.55E-08 | 2.70E-07 | TMEM119          |
| ENSG00000164318 | 11.59    | 6.91           | 1.31  | 5.26 | 1.42E-07 | 4.98E-07 | EGFLAM           |
| ENSG00000183072 | 11.58    | 6.91           | 1.31  | 5.27 | 1.35E-07 | 4.75E-07 | NKX2-5           |
| ENSG00000287086 | 11.12    | 6.84           | 1.39  | 4.91 | 9.11E-07 | 2.98E-06 |                  |
| ENSG00000262633 | 11.04    | 6.84           | 1.36  | 5.04 | 4.74E-07 | 1.59E-06 |                  |
| ENSG00000099399 | 10.99    | 6.83           | 1.32  | 5.19 | 2.12E-07 | 7.30E-07 | MAGEB2           |
| ENSG00000178031 | 10.35    | 6.74           | 1.32  | 5.09 | 3.50E-07 | 1.18E-06 | ADAMTSL1         |
| ENSG00000149451 | 9.72     | 6.65           | 1.33  | 5.00 | 5.88E-07 | 1.95E-06 | ADAM33           |
| ENSG00000269404 | 18.35    | 6.59           | 1.26  | 5.22 | 1.82E-07 | 6.30E-07 | SPIB             |
| ENSG00000136732 | 9.23     | 6.58           | 1.34  | 4.90 | 9.39E-07 | 3.07E-06 | GYPC             |
| ENSG00000255330 | 17.10    | 6.49           | 1.27  | 5.13 | 2.96E-07 | 1.01E-06 |                  |
| ENSG00000288271 | 8.33     | 6.43           | 1.37  | 4.68 | 2.81E-06 | 8.78E-06 |                  |
| ENSG00000105371 | 7.80     | 6.34           | 1.38  | 4.58 | 4.60E-06 | 1.41E-05 | ICAM4            |
| ENSG00000268530 | 7.65     | 6.31           | 1.38  | 4.58 | 4.73E-06 | 1.45E-05 |                  |
| ENSG00000233117 | 15.06    | 6.31           | 1.28  | 4.93 | 8.10E-07 | 2.66E-06 | LINC00702        |
| ENSG00000120937 | 55.52    | 6.29           | 0.77  | 8.17 | 3.01E-16 | 1.83E-15 | NPPB             |
| ENSG00000260228 | 14.79    | 6.28           | 1.28  | 4.89 | 9.88E-07 | 3.22E-06 | <b>CDH13-AS2</b> |
| ENSG00000187664 | 7.14     | 6.21           | 1.50  | 4.14 | 3.52E-05 | 9.80E-05 | HAPLN4           |
| ENSG00000137707 | 7.05     | 6.19           | 1.39  | 4.46 | 8.03E-06 | 2.40E-05 | <b>BTG4</b>      |
| ENSG00000179428 | 6.91     | 6.16           | 1.39  | 4.43 | 9.53E-06 | 2.82E-05 | IL6-AS1          |
| ENSG00000204291 | 6.74     | 6.12           | 1.40  | 4.39 | 1.14E-05 | 3.34E-05 | COL15A1          |
| ENSG00000279933 | 6.73     | 6.12           | 1.40  | 4.38 | 1.18E-05 | 3.47E-05 |                  |
| ENSG00000105472 | 6.73     | 6.12           | 1.40  | 4.37 | 1.26E-05 | 3.70E-05 | CLEC11A          |
| ENSG00000156920 | 6.73     | 6.12           | 1.41  | 4.35 | 1.39E-05 | 4.05E-05 | ADGRG4           |
| ENSG00000187867 | 6.45     | 6.06           | 1.42  | 4.27 | 1.94E-05 | 5.57E-05 | PALM3            |
| ENSG00000136859 | 12.39    | 6.02           | 1.30  | 4.63 | 3.67E-06 | 1.13E-05 | ANGPTL2          |
