# Supplementary material
Source: PubMed Central journal article supplement (PMC10947827)
Supplement: NIHMS1961543-supplement-15.pdf [file NIHMS1961543-supplement-15.pdf]

**Supplemental Table S8. Top 30 gene with increased methylation level in OVCAR5 cells treated with NTX301 compared to DMSO.**

|            | deltaB      | feature | adjP       | Gene       |
|------------|-------------|---------|------------|------------|
| cg02404197 | 0.23949588  | IGR     | 0.03673637 |            |
| cg09506020 | 0.219148206 | Body    | 0.00689918 | GLIS3      |
| cg04104547 | 0.184235375 | IGR     | 0.0454034  |            |
| cg17031475 | 0.162021873 | 3'UTR   | 0.00652111 | GRASP      |
| cg23455597 | 0.161482019 | IGR     | 0.04670546 |            |
| cg22651669 | 0.160850877 | Body    | 0.04257085 | FAT1       |
| cg19049520 | 0.15521189  | Body    | 0.01975286 | CARD10     |
| cg20024221 | 0.153922628 | Body    | 0.01097494 | ZSCAN18    |
| cg03984697 | 0.15218589  | Body    | 0.01987338 | CAPS2      |
| cg05043349 | 0.151862985 | IGR     | 0.01732834 |            |
| cg05672554 | 0.151111361 | IGR     | 0.04313059 |            |
| cg05423768 | 0.147523808 | IGR     | 0.01128075 |            |
| cg21672276 | 0.147345922 | TSS200  | 0.02425071 | ZNF502     |
| cg14103147 | 0.146836229 | IGR     | 0.05704417 |            |
| cg05551403 | 0.14626056  | IGR     | 0.03415674 |            |
| cg14618634 | 0.145914046 | IGR     | 0.01477116 |            |
| cg07478719 | 0.145745103 | Body    | 0.02125899 | AJAP1      |
| cg03190251 | 0.145419194 | Body    | 0.03849851 | ALOX5      |
| cg23282949 | 0.14427982  | TSS1500 | 0.03059649 | RENBP      |
| cg14373018 | 0.144026657 | TSS200  | 0.05757561 | SLC22A20   |
| cg21530453 | 0.143911615 | TSS1500 | 0.0294487  | LOC283856  |
| cg11132661 | 0.14385167  | IGR     | 0.01911101 |            |
| cg20816857 | 0.143838764 | Body    | 0.01745607 | KCNMA1-AS1 |
| cg09433738 | 0.143304241 | Body    | 0.01468702 | SPSB4      |
| cg19073708 | 0.141815503 | IGR     | 0.02009203 |            |
| cg05342682 | 0.141638899 | Body    | 0.01427818 | PON1       |
| cg01225400 | 0.141435529 | Body    | 0.02589006 | SORCS2     |
| cg06313433 | 0.141404274 | Body    | 0.02980702 | FLNB       |
| cg14648688 | 0.141381767 | Body    | 0.00738837 | LINC01210  |
| cg05443763 | 0.14063042  | 5'UTR   | 0.04902382 | PAPPA2     |
