# Supplementary material
Source: PubMed Central journal article supplement (PMC10947827)
Supplement: NIHMS1961543-supplement-16.pdf [file NIHMS1961543-supplement-16.pdf]

Supplemental Material

**Supplemental Table S9. Top 30 gene with decreased methylation level in OVCAR5 cells treated with NTX301 compared to DMSO.**

|            | deltaB       | feature | adjP       | Gene    |
|------------|--------------|---------|------------|---------|
| cg25875908 | -0.394374167 | TSS1500 | 0.0024457  | CHD2    |
| cg08510057 | -0.356599647 | Body    | 0.0024457  | NMD3    |
| cg00759508 | -0.34628592  | TSS1500 | 0.00248297 | CHD2    |
| cg07064066 | -0.338949369 | TSS200  | 0.00332579 | DSCR8   |
| cg26905258 | -0.319796699 | Body    | 0.00293748 | MYCBP2  |
| cg07098123 | -0.316664732 | Body    | 0.00248297 | MTERF   |
| cg09189544 | -0.31546976  | TSS1500 | 0.00300635 | CHD2    |
| cg11941939 | -0.312935912 | Body    | 0.0024457  | TRIO    |
| cg24956715 | -0.312122038 | 5'UTR   | 0.00364078 | MEMO1   |
| cg20070138 | -0.310327302 | Body    | 0.00248297 | FANCM   |
| cg11040676 | -0.306543763 | Body    | 0.0024457  | PDZD2   |
| cg12815355 | -0.304899903 | Body    | 0.00287934 | C2orf3  |
| cg08054187 | -0.304467301 | Body    | 0.00758804 | STK39   |
| cg24383528 | -0.30357178  | 3'UTR   | 0.00742342 | BCCIP   |
| cg08795949 | -0.298069813 | IGR     | 0.00307039 |         |
| cg11587848 | -0.297588881 | IGR     | 0.03640079 |         |
| cg04518668 | -0.296109259 | Body    | 0.00384476 | API5    |
| cg18469713 | -0.29328015  | IGR     | 0.01450998 |         |
| cg25406442 | -0.291268502 | 5'UTR   | 0.00320821 | RBM12B  |
| cg04159766 | -0.290356583 | Body    | 0.00367447 | LAMA3   |
| cg26208981 | -0.284274844 | Body    | 0.00248297 | COG5    |
| cg21165595 | -0.28326735  | Body    | 0.00332579 | TRIM55  |
| cg04473254 | -0.283124843 | Body    | 0.00470669 | UBR3    |
| cg21177902 | -0.281928332 | Body    | 0.00384476 | DIAPH1  |
| cg03071988 | -0.281009696 | Body    | 0.00591731 | ANKRD42 |
| cg11488290 | -0.279989006 | TSS1500 | 0.01307295 | PTPRR   |
| cg01594647 | -0.279351442 | 5'UTR   | 0.00367447 | RFX3    |
| cg26612230 | -0.279277001 | Body    | 0.00332579 | PDLIM5  |
| cg14824190 | -0.278742686 | IGR     | 0.02887142 |         |
| cg02109068 | -0.277980344 | Body    | 0.0234542  | ERCC6L2 |
